# Supplementary material
Source: ML conference proceedings conference paper supplement (https://openreview.net/forum?id=JCz05AtXO3y)
Supplement: supplementary_material [file attachment]

**SLIM**

Structural Landmarking and Interaction Modelling: on Resolution Dilemmas in Graph Classification

**step1. Run or put the decompressed data folder in the data set project which you want，**

**eg.**

unzip -d /SLIM-MUTAG data.zip

**step2. Then unzip the n_LA_NCI1.pkl file to the current folder. If not, skip to the next step.**

**eg.in NCI1**

unzip 1order_LA_NCI1.zip

**step3. Then unzip the adj.pkl file to the current folder. If not, skip to the next step.**

**eg.in Mutag**

unzip adj_train3021.zip

**step4.**

sh slim.sh

[
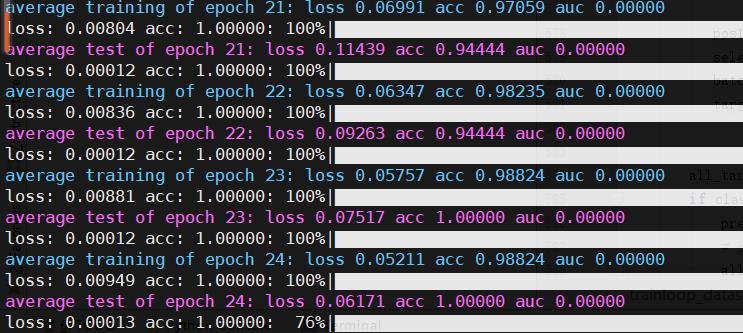
](https://github.com/Avigdor1231/SLIM/blob/master/SLIM-MUTAG/test.jpg)

**Organization of the code**

- util.py (for data loading and basic data organization operators )
- main.py (for containing model, training and test code)
- graphVec.py (for using spatial content information to build features )
- Clustering.py (for clustering using DEC )
- predict.py (for fc layer and prediction results )
- slim.sh (for setting parameters and starting the entire project )
- n_LA_xxx.pkl(for saving the data of the nth order neighbor)
